# Supplementary material for: Vivid visual mental imagery in the absence of the primary visual cortex
Source: PubMed Central journal article supplement — J Neurol. 2011 Nov 8;259(6):1062–70. doi: 10.1007/s00415-011-6299-z (PMC3366182; doi:10.1007/s00415-011-6299-z), 2011-11-08
Supplement: 415_2011_6299_MOESM1_ESM.pdf [file 415_2011_6299_MOESM1_ESM.pdf]

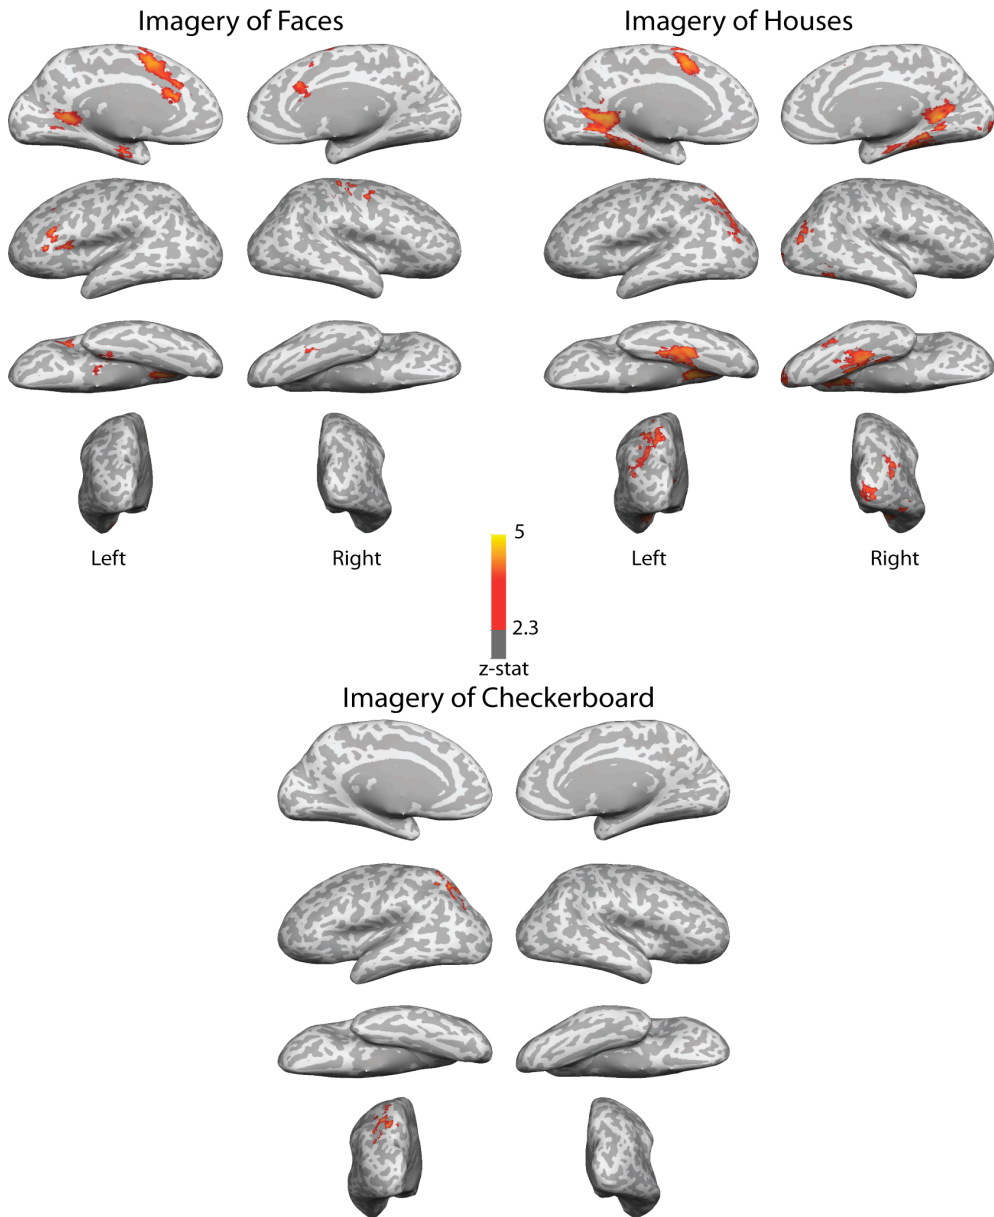

Supplementary Figure 1. Activation to visual mental imagery in control subjects. The group analysis was performed using mixed effects analysis, which takes into account inter-subject variability. The level of activation using this type of analysis is significantly lower than the fixed effects shown in Figure 3.
